# Supplementary material for: Clostridioides difficile para-Cresol Production Is Induced by the Precursor para-Hydroxyphenylacetate
Source: PubMed Central journal article supplement (PMC7925072; doi:10.1128/jb.00282-20), 2020-08-25
Supplement: JB.00282-20-s0002.pdf [file JB.00282-20-s0002.pdf]

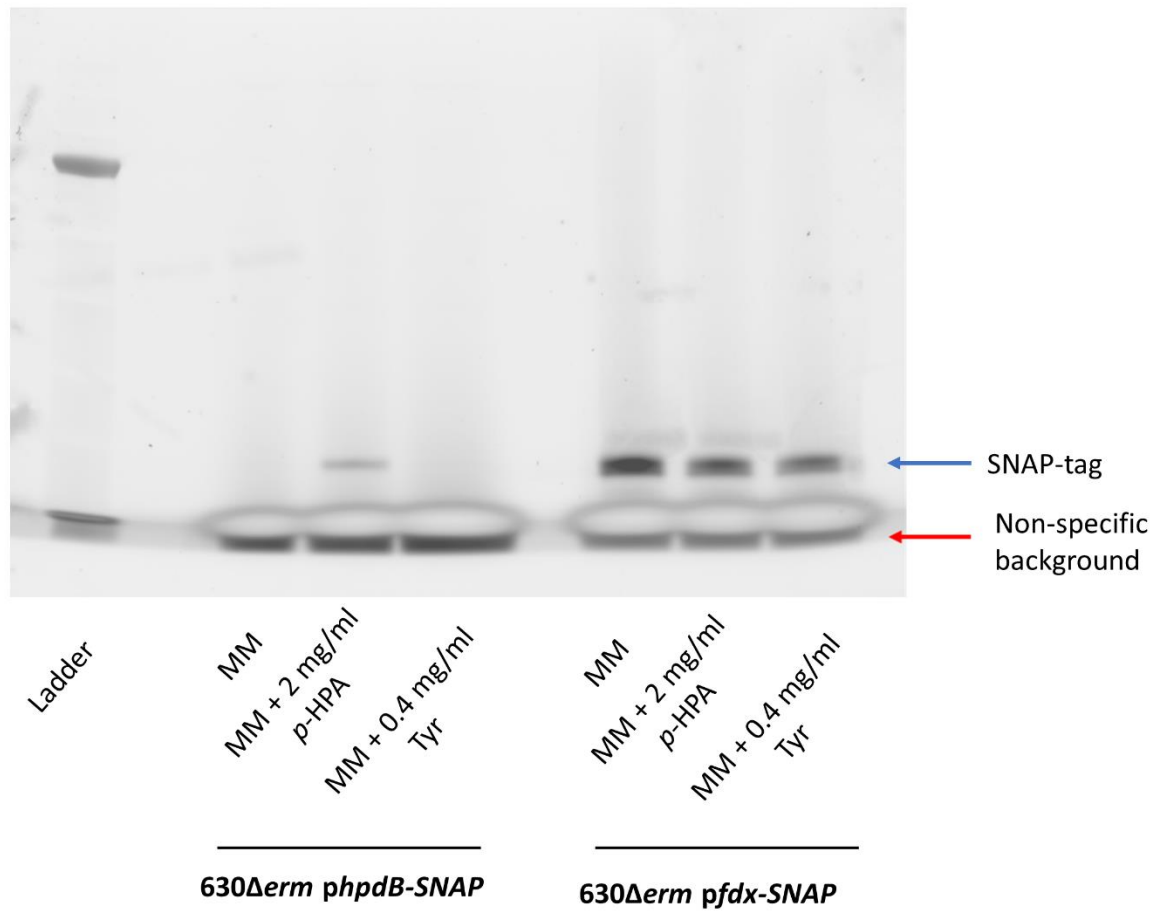

**Figure S1. Uncropped SNAP-tag gel.** Uncropped SNAP-tag gel. Strains *630Δerm P<sub>phpdB</sub>-SNAP* and *630Δerm P<sub>pfdx</sub>-SNAP* were grown for four hours in MM alone, or MM supplemented with 2 mg/ml *p*-HPA or 0.4 mg/ml Tyrosine. Samples were processed with the fluorescent substrate TMR-Star prior to being run on an SDS-PAGE gel and imaged using a Typhoon Trio Variable Mode Imager System (GE Healthcare) with fluorescence detected at 580 nm. Background fluorescence is labelled with a red arrow. The blue arrow indicates the SNAP tag signal.
